# Supplementary material for: Genomic Characterization of <em>Listeria innocua</em> Isolates Recovered from Cattle Farms, Beef Abattoirs, and Retail Outlets in Gauteng Province, South Africa
Source: Preprints.org preprint supplement (doi:10.20944/preprints202307.0587.v1), 2023-07-10
Supplement: Supplementary file 1 [file supplementary]

## Sheet: L.innocuaAMR and Vir
Supplementary Data: Tables S1 and S2
Supplementary data: Table S1. Sources, types of samples, sequence types, and resistance genes detected in L. innocua isolates
Source	SampleID	Species	Source	Type	Class	ST	X.FILE	NUM_FOUND	ant.6..Ia	dfrG	fosX	lin	lnu.D.	lnu.G.	mef.A.	mph.B.	msr.D.	tet.M.	tet.S.	vat.B.	vga.B.
Retail outlets	CFSAN117453	Listeria innocua	CHAIN RETAIL	RAW BEEF	RAW	1008	CFSAN117453	3	.	.	100.00	99.81	.	.	.	.	.	100.00	.	.	.
(n=61)	CFSAN117455	Listeria innocua	LARGE RETAIL	VIENNA	RTE	637	CFSAN117455	2	.	.	100.00	99.81	.	.	.	.	.	.	.	.	.
	CFSAN117457	Listeria innocua	CHAIN RETAIL	BILTONG	RTE	1085	CFSAN117457	2	.	.	100.00	99.94	.	.	.	.	.	.	.	.	.
	CFSAN117458	Listeria innocua	MEDIUM RETAIL	WORS	MILLED BEEF	1085	CFSAN117458	2	.	.	100.00	99.94	.	.	.	.	.	.	.	.	.
	CFSAN117459	Listeria innocua	CHAIN RETAIL	VIENNA	RTE	1489	CFSAN117459	3	.	100.00	100.00	99.81	.	.	.	.	.	.	.	.	.
	CFSAN117460	Listeria innocua	MEDIUM RETAIL	VIENNA	RTE	1085	CFSAN117460	2	.	.	100.00	99.94	.	.	.	.	.	.	.	.	.
	CFSAN117465	Listeria innocua	CHAIN RETAIL	BILTONG	RTE	637	CFSAN117465	3	.	.	100.00	99.81	.	.	.	.	.	100.00	.	.	.
	CFSAN117467	Listeria innocua	MEDIUM RETAIL	BEEF CHUCK	RAW	1085	CFSAN117467	2	.	.	100.00	99.94	.	.	.	.	.	.	.	.	.
	CFSAN117469	Listeria innocua	SMALL RETAIL	LIVER	OFFAL & ORGANS	1085	CFSAN117469	2	.	.	100.00	99.94	.	.	.	.	.	.	.	.	.
	CFSAN117474	Listeria innocua	CHAIN RETAIL	OFFAL	OFFAL & ORGANS	448	CFSAN117474	2	.	.	100.00	99.81	.	.	.	.	.	.	.	.	.
	CFSAN117475	Listeria innocua	CHAIN RETAIL	BEEF BURGER	MILLED BEEF	637	CFSAN117475	2	.	.	100.00	99.81	.	.	.	.	.	.	.	.	.
	CFSAN117476	Listeria innocua	LARGE RETAIL	WORS	MILLED BEEF	448	CFSAN117476	2	.	.	100.00	99.81	.	.	.	.	.	.	.	.	.
	CFSAN117477	Listeria innocua	LARGE RETAIL	MINCED BEEF	MILLED BEEF	448	CFSAN117477	2	.	.	100.00	99.81	.	.	.	.	.	.	.	.	.
	CFSAN117478	Listeria innocua	LARGE RETAIL	MINCED BEEF	MILLED BEEF	637	CFSAN117478	2	.	.	100.00	99.81	.	.	.	.	.	.	.	.	.
	CFSAN117480	Listeria innocua	LARGE RETAIL	BEEF POLONY	RTE	637	CFSAN117480	2	.	.	100.00	99.81	.	.	.	.	.	.	.	.	.
	CFSAN117482	Listeria innocua	MEDIUM RETAIL	MINCED BEEF	MILLED BEEF	448	CFSAN117482	2	.	.	100.00	99.81	.	.	.	.	.	.	.	.	.
	CFSAN117483	Listeria innocua	MEDIUM RETAIL	MINCED BEEF	MILLED BEEF	448	CFSAN117483	2	.	.	100.00	99.81	.	.	.	.	.	.	.	.	.
	CFSAN117484	Listeria innocua	MEDIUM RETAIL	WORS	MILLED BEEF	1008	CFSAN117484	3	.	.	100.00	99.81	.	.	.	.	.	100.00	.	.	.
	CFSAN117485	Listeria innocua	LARGE RETAIL	MINCED BEEF	MILLED BEEF	448	CFSAN117485	2	.	.	100.00	99.81	.	.	.	.	.	.	.	.	.
	CFSAN117487	Listeria innocua	MEDIUM RETAIL	WORS	MILLED BEEF	448	CFSAN117487	2	.	.	100.00	99.81	.	.	.	.	.	.	.	.	.
	CFSAN117488	Listeria innocua	MEDIUM RETAIL	MINCED BEEF	MILLED BEEF	1085	CFSAN117488	2	.	.	100.00	99.94	.	.	.	.	.	.	.	.	.
	CFSAN117489	Listeria innocua	LARGE RETAIL	MINCED BEEF	MILLED BEEF	448	CFSAN117489	2	.	.	100.00	99.81	.	.	.	.	.	.	.	.	.
	CFSAN117491	Listeria innocua	SMALL RETAIL	OFFAL	OFFAL & ORGANS	1008	CFSAN117491	5	.	.	100.00	99.81	.	.	.	.	.	100.00	.	100.00	100.00
	CFSAN117496	Listeria innocua	CHAIN RETAIL	VIENNA	RTE	537	CFSAN117496	3	.	.	100.00	99.81	.	.	.	.	.	100.00	.	.	.
	CFSAN117500	Listeria innocua	MEDIUM RETAIL	VIENNA	RTE	637	CFSAN117500	3	.	.	100.00	99.81	.	.	.	.	.	100.00	.	.	.
	CFSAN117502	Listeria innocua	CHAIN RETAIL	OFFAL	OFFAL & ORGANS	637	CFSAN117502	3	.	.	100.00	99.81	.	.	.	.	.	100.00	.	.	.
	CFSAN117505	Listeria innocua	CHAIN RETAIL	OFFAL	OFFAL & ORGANS	1008	CFSAN117505	3	.	.	100.00	99.81	.	.	.	.	.	100.00	.	.	.
	CFSAN117506	Listeria innocua	SMALL RETAIL	BEEF BURGER	MILLED BEEF	-	CFSAN117506	4	.	100.00	100.00	99.81	.	.	.	.	.	100.00	.	.	.
	CFSAN117507	Listeria innocua	LARGE RETAIL	VIENNA	RTE	1085	CFSAN117507	2	.	.	100.00	99.94	.	.	.	.	.	.	.	.	.
	CFSAN117508	Listeria innocua	LARGE RETAIL	OFFAL	OFFAL & ORGANS	1085	CFSAN117508	2	.	.	100.00	99.94	.	.	.	.	.	.	.	.	.
	CFSAN117509	Listeria innocua	MEDIUM RETAIL	FRENCH RUSSIAN	RTE	448	CFSAN117509	2	.	.	100.00	99.81	.	.	.	.	.	.	.	.	.
	CFSAN117510	Listeria innocua	MEDIUM RETAIL	WORS	MILLED BEEF	1085	CFSAN117510	2	.	.	100.00	99.94	.	.	.	.	.	.	.	.	.
	CFSAN117511	Listeria innocua	MEDIUM RETAIL	BEEF BURGER	MILLED BEEF	448	CFSAN117511	2	.	.	100.00	99.81	.	.	.	.	.	.	.	.	.
	CFSAN117512	Listeria innocua	MEDIUM RETAIL	BEEF CHUCK	RAW	637	CFSAN117512	3	.	.	100.00	99.81	.	.	.	.	.	100.00	.	.	.
	CFSAN117513	Listeria innocua	LARGE RETAIL	MINCED BEEF	MILLED BEEF	537	CFSAN117513	3	.	.	100.00	99.81	.	.	.	.	.	100.00	.	.	.
	CFSAN117514	Listeria innocua	CHAIN RETAIL	WORS	MILLED BEEF	448	CFSAN117514	2	.	.	100.00	99.81	.	.	.	.	.	.	.	.	.
	CFSAN117515	Listeria innocua	CHAIN RETAIL	MINCED BEEF	MILLED BEEF	448	CFSAN117515	2	.	.	100.00	99.81	.	.	.	.	.	.	.	.	.
	CFSAN117516	Listeria innocua	LARGE RETAIL	MINCED BEEF	MILLED BEEF	1008	CFSAN117516	3	.	.	100.00	99.81	.	.	.	.	.	100.00	.	.	.
	CFSAN117517	Listeria innocua	LARGE RETAIL	WORS	MILLED BEEF	448	CFSAN117517	2	.	.	100.00	99.81	.	.	.	.	.	.	.	.	.
	CFSAN117518	Listeria innocua	MEDIUM RETAIL	WORS	MILLED BEEF	1482	CFSAN117518	2	.	.	100.00	99.81	.	.	.	.	.	.	.	.	.
	CFSAN117519	Listeria innocua	MEDIUM RETAIL	BEEF CHUCK	RAW	448	CFSAN117519	2	.	.	100.00	99.81	.	.	.	.	.	.	.	.	.
	CFSAN117520	Listeria innocua	CHAIN RETAIL	BEEF SHIN	RAW	1085	CFSAN117520	2	.	.	100.00	99.94	.	.	.	.	.	.	.	.	.
	CFSAN117521	Listeria innocua	SMALL RETAIL	BEEF CHUCK	RAW	1619	CFSAN117521	4	.	.	100.00	99.81	100.00	.	.	.	.	100.00	.	.	.
	CFSAN117523	Listeria innocua	SMALL RETAIL	BILTONG	RTE	637	CFSAN117523	3	.	.	100.00	99.81	.	.	.	.	.	100.00	.	.	.
	CFSAN117525	Listeria innocua	LARGE RETAIL	BILTONG	RTE	1085	CFSAN117525	2	.	.	100.00	99.94	.	.	.	.	.	.	.	.	.
	CFSAN117526	Listeria innocua	SMALL RETAIL	BEEF CHUCK	RAW	1085	CFSAN117526	2	.	.	100.00	99.94	.	.	.	.	.	.	.	.	.
	CFSAN117527	Listeria innocua	SMALL RETAIL	BILTONG	RTE	1489	CFSAN117527	3	.	100.00	100.00	99.81	.	.	.	.	.	.	.	.	.
	CFSAN117528	Listeria innocua	LARGE RETAIL	BRISKET	RAW	1489	CFSAN117528	3	.	100.00	100.00	99.81	.	.	.	.	.	.	.	.	.
	CFSAN117529	Listeria innocua	LARGE RETAIL	MINCED BEEF	MILLED BEEF	1489	CFSAN117529	3	.	100.00	100.00	99.81	.	.	.	.	.	.	.	.	.
	CFSAN117530	Listeria innocua	LARGE RETAIL	WORS	MILLED BEEF	1489	CFSAN117530	3	.	100.00	100.00	99.81	.	.	.	.	.	.	.	.	.
	CFSAN117531	Listeria innocua	SMALL RETAIL	BEEF CHUCK	RAW	448	CFSAN117531	2	.	.	100.00	99.81	.	.	.	.	.	.	.	.	.
	CFSAN117534	Listeria innocua	SMALL RETAIL	BEEF BURGER	MILLED BEEF	1489	CFSAN117534	3	.	100.00	100.00	99.81	.	.	.	.	.	.	.	.	.
	CFSAN117535	Listeria innocua	CHAIN RETAIL	OFFAL	OFFAL & ORGANS	1489	CFSAN117535	3	.	100.00	100.00	99.81	.	.	.	.	.	.	.	.	.
	CFSAN117536	Listeria innocua	CHAIN RETAIL	MINCED BEEF	MILLED BEEF	448	CFSAN117536	2	.	.	100.00	99.81	.	.	.	.	.	.	.	.	.
	CFSAN117538	Listeria innocua	CHAIN RETAIL	BEEF STEW	RAW	448	CFSAN117538	2	.	.	100.00	99.81	.	.	.	.	.	.	.	.	.
	CFSAN117539	Listeria innocua	MEDIUM RETAIL	WORS	MILLED BEEF	448	CFSAN117539	2	.	.	100.00	99.81	.	.	.	.	.	.	.	.	.
	CFSAN117540	Listeria innocua	MEDIUM RETAIL	BEEF STEAK	RAW	448	CFSAN117540	2	.	.	100.00	99.81	.	.	.	.	.	.	.	.	.
	CFSAN117547	Listeria innocua	LARGE RETAIL	KIDNEY	OFFAL & ORGANS	448	CFSAN117547	2	.	.	100.00	99.81	.	.	.	.	.	.	.	.	.
	CFSAN117549	Listeria innocua	CHAIN RETAIL	MINCED BEEF	MILLED BEEF	1085	CFSAN117549	2	.	.	100.00	99.94	.	.	.	.	.	.	.	.	.
	CFSAN117550	Listeria innocua	SMALL RETAIL	WORS	MILLED BEEF	602	CFSAN117550	2	.	.	100.00	99.81	.	.	.	.	.	.	.	.	.
	CFSAN117551	Listeria innocua	MEDIUM RETAIL	OFFAL	OFFAL & ORGANS	637	CFSAN117551	5	100.00	.	100.00	99.81	.	.	.	98.68	.	100.00	.	.	.
Farms	CFSAN117552	Listeria innocua	COMMUNAL FARM	FAECES	FAECES	637	CFSAN117552	2	.	.	100.00	99.81	.	.	.	.	.	.	.	.	.
(n=34)	CFSAN117553	Listeria innocua	COMMUNAL FARM	FAECES	FAECES	537	CFSAN117553	3	.	.	100.00	99.81	.	.	.	.	.	100.00	.	.	.
	CFSAN117554	Listeria innocua	COMMUNAL FARM	FAECES	FAECES	637	CFSAN117554	2	.	.	100.00	99.81	.	.	.	.	.	.	.	.	.
	CFSAN117556	Listeria innocua	COMMUNAL FARM	ENVIRONMENTAL-FAECES	ENVIRONMENT	1482	CFSAN117556	3	.	.	100.00	99.81	.	.	.	.	.	100.00	.	.	.
	CFSAN117557	Listeria innocua	COMMUNAL FARM	FAECES	FAECES	1087	CFSAN117557	2	.	.	100.00	99.81	.	.	.	.	.	.	.	.	.
	CFSAN117558	Listeria innocua	COMMUNAL FARM	FAECES	FAECES	637	CFSAN117558	2	.	.	100.00	99.81	.	.	.	.	.	.	.	.	.
	CFSAN117560	Listeria innocua	COMMUNAL FARM	FAECES	ENVIRONMENT	637	CFSAN117560	2	.	.	100.00	99.81	.	.	.	.	.	.	.	.	.
	CFSAN117563	Listeria innocua	COMMUNAL FARM	FAECES	ENVIRONMENT	637	CFSAN117563	2	.	.	100.00	99.81	.	.	.	.	.	.	.	.	.
	CFSAN117564	Listeria innocua	COW-CALF OPERATION	FAECES	FAECES	637	CFSAN117564	2	.	.	100.00	99.81	.	.	.	.	.	.	.	.	.
	CFSAN117566	Listeria innocua	COW-CALF OPERATION	FAECES	FAECES	637	CFSAN117566	2	.	.	100.00	99.81	.	.	.	.	.	.	.	.	.
	CFSAN117568	Listeria innocua	COW-CALF OPERATION	FAECES	FAECES	637	CFSAN117568	2	.	.	100.00	99.81	.	.	.	.	.	.	.	.	.
	CFSAN117569	Listeria innocua	COW-CALF OPERATION	FAECES	FAECES	637	CFSAN117569	2	.	.	100.00	99.81	.	.	.	.	.	.	.	.	.
	CFSAN117570	Listeria innocua	COW-CALF OPERATION	ENVIRONMENTAL-FAECES	ENVIRONMENT	537	CFSAN117570	3	.	.	100.00	99.81	.	.	.	.	.	100.00	.	.	.
	CFSAN117573	Listeria innocua	COW-CALF OPERATION	FAECES	FAECES	-	CFSAN117573	4	.	.	100.00	99.94	.	100.00	.	.	.	100.00	.	.	.
	CFSAN117574	Listeria innocua	COW-CALF OPERATION	FAECES	ENVIRONMENT	637	CFSAN117574	2	.	.	100.00	99.81	.	.	.	.	.	.	.	.	.
	CFSAN117575	Listeria innocua	COW-CALF OPERATION	FAECES	FAECES	637	CFSAN117575	2	.	.	100.00	99.81	.	.	.	.	.	.	.	.	.
	CFSAN117576	Listeria innocua	COW-CALF OPERATION	FAECES	FAECES	637	CFSAN117576	2	.	.	100.00	99.81	.	.	.	.	.	.	.	.	.
	CFSAN117578	Listeria innocua	COW-CALF OPERATION	FAECES	FAECES	637	CFSAN117578	2	.	.	100.00	99.81	.	.	.	.	.	.	.	.	.
	CFSAN117579	Listeria innocua	COW-CALF OPERATION	FAECES	FAECES	448	CFSAN117579	2	.	.	100.00	99.81	.	.	.	.	.	.	.	.	.
	CFSAN117580	Listeria innocua	COW-CALF OPERATION	ENVIRONMENTAL-WATER	ENVIRONMENT	1482	CFSAN117580	2	.	.	100.00	99.81	.	.	.	.	.	.	.	.	.
	CFSAN117581	Listeria innocua	COW-CALF OPERATION	FAECES	FAECES	448	CFSAN117581	2	.	.	100.00	99.81	.	.	.	.	.	.	.	.	.
	CFSAN117582	Listeria innocua	COW-CALF OPERATION	FEED	FEED	637	CFSAN117582	2	.	.	100.00	99.81	.	.	.	.	.	.	.	.	.
	CFSAN117583	Listeria innocua	FEEDLOT FARM	FAECES	FAECES	1482	CFSAN117583	4	.	.	100.00	99.81	100.00	.	.	.	.	100.00	.	.	.
	CFSAN117585	Listeria innocua	FEEDLOT FARM	FAECES	FAECES	43	CFSAN117585	2	.	.	100.00	99.81	.	.	.	.	.	.	.	.	.
	CFSAN117586	Listeria innocua	FEEDLOT FARM	FEED	FEED	637	CFSAN117586	2	.	.	100.00	99.81	.	.	.	.	.	.	.	.	.
	CFSAN117587	Listeria innocua	FEEDLOT FARM	FEED	FEED	637	CFSAN117587	3	.	.	100.00	99.81	.	.	.	.	.	100.00	.	.	.
	CFSAN117589	Listeria innocua	FEEDLOT FARM	FAECES	FAECES	1482	CFSAN117589	2	.	.	100.00	99.81	.	.	.	.	.	.	.	.	.
	CFSAN117590	Listeria innocua	FEEDLOT FARM	FAECES	FAECES	1482	CFSAN117590	2	.	.	100.00	99.81	.	.	.	.	.	.	.	.	.
	CFSAN117591	Listeria innocua	FEEDLOT FARM	FAECES	FAECES	1482	CFSAN117591	3	.	.	100.00	99.81	.	.	.	.	.	100.00	.	.	.
	CFSAN117592	Listeria innocua	FEEDLOT FARM	ENVIRONMENTAL-WATER	ENVIRONMENT	637	CFSAN117592	2	.	.	100.00	99.81	.	.	.	.	.	.	.	.	.
	CFSAN117593	Listeria innocua	FEEDLOT FARM	FAECES	FAECES	1610	CFSAN117593	7	.	.	100.00	99.81	100.00	.	100.00	99.12	100.00	.	100.00	.	.
	CFSAN117594	Listeria innocua	FEEDLOT FARM	FAECES	FAECES	1610	CFSAN117594	7	.	.	100.00	99.81	100.00	.	100.00	99.12	100.00	.	100.00	.	.
	CFSAN117595	Listeria innocua	FEEDLOT FARM	FAECES	FAECES	1610	CFSAN117595	7	.	.	100.00	99.81	100.00	.	100.00	99.12	100.00	.	100.00	.	.
	CFSAN117596	Listeria innocua	FEEDLOT FARM	ENVIRONMENTAL-WATER	ENVIRONMENT	1610	CFSAN117596	7	.	.	100.00	99.81	100.00	.	100.00	99.12	100.00	.	100.00	.	.
Abattoir	CFSAN119108	Listeria innocua	HIGH THROUGHPUT (HT)	ENVIRONMENTAL-EFFLUENT	ENVIRONMENT	637	CFSAN119108	2	.	.	100.00	99.81	.	.	.	.	.	.	.	.	.
(n=15)	CFSAN119109	Listeria innocua	HIGH THROUGHPUT (HT)	ENVIRONMENTAL-EFFLUENT	ENVIRONMENT	637	CFSAN119109	2	.	.	100.00	99.81	.	.	.	.	.	.	.	.	.
	CFSAN119115	Listeria innocua	LOW THROUGHPUT (LT)	FAECES	FAECES	537	CFSAN119115	3	.	.	100.00	99.81	.	.	.	.	.	100.00	.	.	.
	CFSAN119116	Listeria innocua	LOW THROUGHPUT (LT)	ENVIRONMENTAL-EFFLUENT	ENVIRONMENT	537	CFSAN119116	3	.	.	100.00	99.81	.	.	.	.	.	100.00	.	.	.
	CFSAN119121	Listeria innocua	HIGH THROUGHPUT (HT)	ENVIRONMENTAL-EFFLUENT	ENVIRONMENT	1085	CFSAN119121	2	.	.	100.00	99.94	.	.	.	.	.	.	.	.	.
	CFSAN119124	Listeria innocua	HIGH THROUGHPUT (HT)	ENVIRONMENTAL-EFFLUENT	ENVIRONMENT	1489	CFSAN119124	3	.	100.00	100.00	99.81	.	.	.	.	.	.	.	.	.
	CFSAN119125	Listeria innocua	LOW THROUGHPUT (LT)	PRE-EVISCERATION CARCASS SWAB	CARCASS	537	CFSAN119125	3	.	.	100.00	99.81	.	.	.	.	.	100.00	.	.	.
	CFSAN119126	Listeria innocua	HIGH THROUGHPUT (HT)	FAECES	FAECES	537	CFSAN119126	3	.	.	100.00	99.81	.	.	.	.	.	100.00	.	.	.
	CFSAN119127	Listeria innocua	HIGH THROUGHPUT (HT)	FAECES	FAECES	537	CFSAN119127	3	.	.	100.00	99.81	.	.	.	.	.	100.00	.	.	.
	CFSAN119128	Listeria innocua	HIGH THROUGHPUT (HT)	PRE-EVISCERATION CARCASS SWAB	CARCASS	537	CFSAN119128	3	.	.	100.00	99.81	.	.	.	.	.	100.00	.	.	.
	CFSAN119129	Listeria innocua	HIGH THROUGHPUT (HT)	ENVIRONMENTAL-EFFLUENT	ENVIRONMENT	537	CFSAN119129	3	.	.	100.00	99.81	.	.	.	.	.	100.00	.	.	.
	CFSAN119130	Listeria innocua	HIGH THROUGHPUT (HT)	FAECES	FAECES	537	CFSAN119130	3	.	.	100.00	99.81	.	.	.	.	.	100.00	.	.	.
	CFSAN119131	Listeria innocua	HIGH THROUGHPUT (HT)	FAECES	FAECES	537	CFSAN119131	3	.	.	100.00	99.81	.	.	.	.	.	100.00	.	.	.
	CFSAN119132	Listeria innocua	HIGH THROUGHPUT (HT)	PRE-EVISCERATION CARCASS SWAB	CARCASS	537	CFSAN119132	3	.	.	100.00	99.81	.	.	.	.	.	100.00	.	.	.
	CFSAN119133	Listeria innocua	HIGH THROUGHPUT (HT)	ENVIRONMENTAL-EFFLUENT	ENVIRONMENT	537	CFSAN119133	3	.	.	100.00	99.81	.	.	.	.	.	100.00	.	.	.
Total
(n=110)
Supplementary data. Table S2. Sources, types of samples, sequence types, and virulence genes detected in L. innocua isolates
Source	SampleID	Species	Source	Type	Class	ST	X.FILE	NUM_FOUND	clpC	clpE	clpP	fbpA	gtcA	hbp1.svpA	hbp2	iap.cwhA	lap	llsA	llsB	llsD	llsG	llsH	llsP	llsX	llsY	lpeA	lplA1	lspA	oatA	pdgA	prsA2
Retail outlets	CFSAN117453	Listeria innocua	CHAIN RETAIL	RAW BEEF	RAW	1008	CFSAN117453	19	100	99.77	100	100	94.98	99.84	99.82	97.10	99.92	96.00	.	.	100.00	98.40	.	100.00	.	100	100	100	99.79	100.00	99.32
(n=61)	CFSAN117455	Listeria innocua	LARGE RETAIL	VIENNA	RTE	637	CFSAN117455	15	100	99.77	99.66	100	94.98	99.84	99.82	96.27	99.92	.	.	.	.	.	.	.	.	100	100	100	99.79	100.00	99.32
	CFSAN117457	Listeria innocua	CHAIN RETAIL	BILTONG	RTE	1085	CFSAN117457	15	100	99.77	100	100	99.54	99.84	99.82	97.10	99.92	.	.	.	.	.	.	.	.	100	97.49	100	99.79	100.00	99.32
	CFSAN117458	Listeria innocua	MEDIUM RETAIL	WORS	MILLED BEEF	1085	CFSAN117458	15	100	99.77	100	100	99.54	99.84	99.82	97.10	99.92	.	.	.	.	.	.	.	.	100	100	100	99.79	100.00	99.32
	CFSAN117459	Listeria innocua	CHAIN RETAIL	VIENNA	RTE	1489	CFSAN117459	21	100	99.77	99.66	100	99.54	99.84	99.82	97.10	99.92	100.00	.	100.00	100.00	100.00	.	98.74	100.00	100	100	100	99.79	100.00	99.32
	CFSAN117460	Listeria innocua	MEDIUM RETAIL	VIENNA	RTE	1085	CFSAN117460	15	100	99.77	100	100	99.54	99.84	99.82	97.10	99.92	.	.	.	.	.	.	.	.	100	100	100	99.79	100.00	99.32
	CFSAN117465	Listeria innocua	CHAIN RETAIL	BILTONG	RTE	637	CFSAN117465	15	100	99.77	99.66	100	94.98	99.84	99.82	96.27	99.92	.	.	.	.	.	.	.	.	100	100	100	99.79	100.00	99.32
	CFSAN117467	Listeria innocua	MEDIUM RETAIL	BEEF CHUCK	RAW	1085	CFSAN117467	15	100	99.77	100	100	99.54	99.84	99.82	97.10	99.92	.	.	.	.	.	.	.	.	100	100	100	99.79	100.00	99.32
	CFSAN117469	Listeria innocua	SMALL RETAIL	LIVER	OFFAL & ORGANS	1085	CFSAN117469	15	100	99.77	100	100	99.54	99.84	99.82	97.10	99.92	.	.	.	.	.	.	.	.	100	100	100	99.79	100.00	99.32
	CFSAN117474	Listeria innocua	CHAIN RETAIL	OFFAL	OFFAL & ORGANS	448	CFSAN117474	19	100	99.77	100	100	94.98	99.84	99.82	97.10	99.92	96.00	.	.	100.00	100.00	.	100.00	.	100	100	100	99.79	100.00	99.32
	CFSAN117475	Listeria innocua	CHAIN RETAIL	BEEF BURGER	MILLED BEEF	637	CFSAN117475	15	100	99.77	99.66	100	94.98	99.84	99.82	96.27	99.92	.	.	.	.	.	.	.	.	100	100	100	99.79	100.00	99.32
	CFSAN117476	Listeria innocua	LARGE RETAIL	WORS	MILLED BEEF	448	CFSAN117476	19	100	99.77	100	100	94.98	99.84	99.82	97.10	99.92	96.00	.	.	100.00	100.00	.	100.00	.	100	100	100	99.79	100.00	99.32
	CFSAN117477	Listeria innocua	LARGE RETAIL	MINCED BEEF	MILLED BEEF	448	CFSAN117477	19	100	99.77	100	100	94.98	99.84	99.82	97.10	99.92	96.00	.	.	100.00	100.00	.	100.00	.	100	100	100	99.79	100.00	99.32
	CFSAN117478	Listeria innocua	LARGE RETAIL	MINCED BEEF	MILLED BEEF	637	CFSAN117478	15	100	99.77	99.66	100	94.98	99.84	99.82	96.27	99.92	.	.	.	.	.	.	.	.	100	100	100	99.79	100.00	99.32
	CFSAN117480	Listeria innocua	LARGE RETAIL	BEEF POLONY	RTE	637	CFSAN117480	15	100	99.77	99.66	100	94.98	99.84	99.82	96.27	99.92	.	.	.	.	.	.	.	.	100	100	100	99.79	100.00	99.32
	CFSAN117482	Listeria innocua	MEDIUM RETAIL	MINCED BEEF	MILLED BEEF	448	CFSAN117482	19	100	99.77	100	100	94.98	99.84	99.82	97.10	99.92	96.00	.	.	100.00	100.00	.	100.00	.	100	100	100	99.79	100.00	99.32
	CFSAN117483	Listeria innocua	MEDIUM RETAIL	MINCED BEEF	MILLED BEEF	448	CFSAN117483	19	100	99.77	100	100	94.98	99.84	99.82	97.10	99.92	96.00	.	.	100.00	100.00	.	100.00	.	100	100	100	99.79	100.00	99.32
	CFSAN117484	Listeria innocua	MEDIUM RETAIL	WORS	MILLED BEEF	1008	CFSAN117484	19	100	99.77	100	100	94.98	99.84	99.82	97.10	99.92	96.00	.	.	100.00	98.40	.	100.00	.	100	100	100	99.79	100.00	99.32
	CFSAN117485	Listeria innocua	LARGE RETAIL	MINCED BEEF	MILLED BEEF	448	CFSAN117485	19	100	99.77	100	100	94.98	99.84	99.82	97.10	99.92	96.00	.	.	100.00	100.00	.	100.00	.	100	100	100	99.79	100.00	99.32
	CFSAN117487	Listeria innocua	MEDIUM RETAIL	WORS	MILLED BEEF	448	CFSAN117487	19	100	99.77	100	100	94.98	99.84	99.82	97.10	99.92	96.00	.	.	100.00	100.00	.	100.00	.	100	100	100	99.79	100.00	99.32
	CFSAN117488	Listeria innocua	MEDIUM RETAIL	MINCED BEEF	MILLED BEEF	1085	CFSAN117488	15	100	99.77	100	100	99.54	99.84	99.82	97.10	99.92	.	.	.	.	.	.	.	.	100	100	100	99.79	100.00	99.32
	CFSAN117489	Listeria innocua	LARGE RETAIL	MINCED BEEF	MILLED BEEF	448	CFSAN117489	19	100	99.77	100	100	94.98	99.84	99.82	97.10	99.92	96.00	.	.	100.00	100.00	.	80.82	.	100	100	100	99.79	100.00	99.32
	CFSAN117491	Listeria innocua	SMALL RETAIL	OFFAL	OFFAL & ORGANS	1008	CFSAN117491	19	100	99.77	100	100	94.98	99.84	99.82	97.10	99.92	96.00	.	.	100.00	98.40	.	100.00	.	100	100	100	99.79	100.00	99.32
	CFSAN117496	Listeria innocua	CHAIN RETAIL	VIENNA	RTE	537	CFSAN117496	19	100	99.77	99.66	100	99.54	99.84	99.82	97.10	99.92	100.00	.	.	100.00	80.93	.	100.00	.	100	100	100	99.79	100.00	99.32
	CFSAN117500	Listeria innocua	MEDIUM RETAIL	VIENNA	RTE	637	CFSAN117500	15	100	99.77	99.66	100	94.98	99.84	99.82	96.27	99.92	.	.	.	.	.	.	.	.	100	100	100	99.79	100.00	99.32
	CFSAN117502	Listeria innocua	CHAIN RETAIL	OFFAL	OFFAL & ORGANS	637	CFSAN117502	15	100	99.77	99.66	100	94.98	99.84	99.82	96.27	99.92	.	.	.	.	.	.	.	.	100	100	100	99.79	100.00	99.32
	CFSAN117505	Listeria innocua	CHAIN RETAIL	OFFAL	OFFAL & ORGANS	1008	CFSAN117505	19	100	99.77	100	100	94.98	99.84	99.82	97.10	99.92	96.00	.	.	100.00	98.40	.	100.00	.	100	100	100	99.79	100.00	99.32
	CFSAN117506	Listeria innocua	SMALL RETAIL	BEEF BURGER	MILLED BEEF	-	CFSAN117506	19	100	99.77	100	100	99.54	99.84	99.82	97.79	99.92	96.00	.	.	100.00	100.00	.	100.00	.	100	100	100	99.79	100.00	99.32
	CFSAN117507	Listeria innocua	LARGE RETAIL	VIENNA	RTE	1085	CFSAN117507	15	100	99.77	100	100	99.54	99.84	99.82	97.10	99.92	.	.	.	.	.	.	.	.	100	100	100	99.79	100.00	99.32
	CFSAN117508	Listeria innocua	LARGE RETAIL	OFFAL	OFFAL & ORGANS	1085	CFSAN117508	15	100	99.77	100	100	99.54	99.84	99.82	97.10	99.92	.	.	.	.	.	.	.	.	100	100	100	99.79	100.00	99.32
	CFSAN117509	Listeria innocua	MEDIUM RETAIL	FRENCH RUSSIAN	RTE	448	CFSAN117509	19	100	99.77	100	100	94.98	99.84	99.82	97.10	99.92	96.00	.	.	100.00	100.00	.	100.00	.	100	100	100	99.79	100.00	99.32
	CFSAN117510	Listeria innocua	MEDIUM RETAIL	WORS	MILLED BEEF	1085	CFSAN117510	15	100	99.77	100	100	99.54	99.84	99.82	97.10	99.92	.	.	.	.	.	.	.	.	100	100	100	99.79	100.00	99.32
	CFSAN117511	Listeria innocua	MEDIUM RETAIL	BEEF BURGER	MILLED BEEF	448	CFSAN117511	18	100	99.77	100	100	.	99.84	99.82	97.10	99.92	96.00	.	.	100.00	100.00	.	100.00	.	100	100	100	99.79	100.00	99.32
	CFSAN117512	Listeria innocua	MEDIUM RETAIL	BEEF CHUCK	RAW	637	CFSAN117512	15	100	99.77	99.66	100	94.98	99.84	99.82	96.27	99.92	.	.	.	.	.	.	.	.	100	100	100	99.79	100.00	99.32
	CFSAN117513	Listeria innocua	LARGE RETAIL	MINCED BEEF	MILLED BEEF	537	CFSAN117513	19	100	99.77	99.66	100	99.54	99.84	99.82	97.10	99.92	100.00	.	.	100.00	100.00	.	100.00	.	100	100	100	99.79	100.00	99.32
	CFSAN117514	Listeria innocua	CHAIN RETAIL	WORS	MILLED BEEF	448	CFSAN117514	18	100	99.77	100	100	.	99.84	99.82	97.10	99.92	96.00	.	.	100.00	100.00	.	100.00	.	100	100	100	99.79	100.00	99.32
	CFSAN117515	Listeria innocua	CHAIN RETAIL	MINCED BEEF	MILLED BEEF	448	CFSAN117515	18	100	99.77	100	100	.	99.84	99.82	97.10	99.92	96.00	.	.	100.00	100.00	.	100.00	.	100	100	100	99.79	100.00	99.32
	CFSAN117516	Listeria innocua	LARGE RETAIL	MINCED BEEF	MILLED BEEF	1008	CFSAN117516	19	100	99.77	100	100	94.98	99.84	99.82	97.10	99.92	96.00	.	.	100.00	98.40	.	100.00	.	100	100	100	99.79	100.00	99.32
	CFSAN117517	Listeria innocua	LARGE RETAIL	WORS	MILLED BEEF	448	CFSAN117517	19	100	99.77	100	100	94.98	99.84	99.82	97.10	99.92	96.00	.	.	100.00	100.00	.	100.00	.	100	100	100	99.79	100.00	99.32
	CFSAN117518	Listeria innocua	MEDIUM RETAIL	WORS	MILLED BEEF	1482	CFSAN117518	19	100	99.77	100	100	94.98	99.84	99.82	97.10	99.92	96.00	.	.	100.00	100.00	.	100.00	.	100	100	100	99.79	100.00	99.32
	CFSAN117519	Listeria innocua	MEDIUM RETAIL	BEEF CHUCK	RAW	448	CFSAN117519	19	100	99.77	100	100	94.98	99.84	99.82	97.10	99.92	96.00	.	.	100.00	100.00	.	100.00	.	100	100	100	99.79	100.00	99.32
	CFSAN117520	Listeria innocua	CHAIN RETAIL	BEEF SHIN	RAW	1085	CFSAN117520	15	100	99.77	100	100	99.54	99.84	99.82	97.10	99.92	.	.	.	.	.	.	.	.	100	100	100	99.79	100.00	99.32
	CFSAN117521	Listeria innocua	SMALL RETAIL	BEEF CHUCK	RAW	1619	CFSAN117521	19	100	99.77	100	100	99.54	99.84	99.82	96.69	99.92	100.00	.	.	100.00	100.00	.	100.00	.	100	100	100	99.79	100.00	99.32
	CFSAN117523	Listeria innocua	SMALL RETAIL	BILTONG	RTE	637	CFSAN117523	15	100	99.77	99.66	100	94.98	99.84	99.82	96.27	99.92	.	.	.	.	.	.	.	.	100	100	100	99.79	100.00	99.32
	CFSAN117525	Listeria innocua	LARGE RETAIL	BILTONG	RTE	1085	CFSAN117525	15	100	99.77	100	100	99.54	99.84	99.82	97.10	99.92	.	.	.	.	.	.	.	.	100	100	100	99.79	100.00	99.32
	CFSAN117526	Listeria innocua	SMALL RETAIL	BEEF CHUCK	RAW	1085	CFSAN117526	15	100	99.77	100	100	99.54	99.84	99.82	97.10	99.92	.	.	.	.	.	.	.	.	100	100	100	99.79	100.00	99.32
	CFSAN117527	Listeria innocua	SMALL RETAIL	BILTONG	RTE	1489	CFSAN117527	23	100	99.77	99.66	100	99.54	99.84	99.82	97.10	99.92	100.00	100.00	100.00	100.00	100.00	100.00	98.74	100.00	100	100	100	99.79	100.00	99.32
	CFSAN117528	Listeria innocua	LARGE RETAIL	BRISKET	RAW	1489	CFSAN117528	23	100	99.77	99.66	100	99.54	99.84	99.82	97.10	99.92	100.00	100.00	100.00	100.00	100.00	100.00	98.74	100.00	100	100	100	99.79	100.00	99.32
	CFSAN117529	Listeria innocua	LARGE RETAIL	MINCED BEEF	MILLED BEEF	1489	CFSAN117529	23	100	99.77	99.66	100	99.54	99.84	99.82	97.10	99.92	100.00	100.00	100.00	100.00	100.00	100.00	98.74	100.00	100	100	100	99.79	100.00	99.32
	CFSAN117530	Listeria innocua	LARGE RETAIL	WORS	MILLED BEEF	1489	CFSAN117530	23	100	99.77	99.66	100	99.54	99.84	99.82	97.10	99.92	100.00	100.00	100.00	100.00	100.00	100.00	98.74	100.00	100	100	100	99.79	100.00	99.32
	CFSAN117531	Listeria innocua	SMALL RETAIL	BEEF CHUCK	RAW	448	CFSAN117531	19	100	99.77	100	100	94.98	99.84	99.82	97.10	99.92	96.00	.	.	100.00	100.00	.	100.00	.	100	100	100	99.79	100.00	99.32
	CFSAN117534	Listeria innocua	SMALL RETAIL	BEEF BURGER	MILLED BEEF	1489	CFSAN117534	23	100	99.77	99.66	100	99.54	99.84	99.82	97.10	99.92	100.00	100.00	100.00	100.00	100.00	100.00	98.74	100.00	100	100	100	99.79	100.00	99.32
	CFSAN117535	Listeria innocua	CHAIN RETAIL	OFFAL	OFFAL & ORGANS	1489	CFSAN117535	22	100	99.77	99.66	100	99.54	99.84	99.82	97.10	99.92	100.00	85.27	100.00	100.00	100.00	.	98.74	100.00	100	100	100	99.79	100.00	99.32
	CFSAN117536	Listeria innocua	CHAIN RETAIL	MINCED BEEF	MILLED BEEF	448	CFSAN117536	19	100	99.77	100	100	94.98	99.84	99.82	97.10	99.92	96.00	.	.	100.00	100.00	.	100.00	.	100	100	100	99.79	100.00	99.32
	CFSAN117538	Listeria innocua	CHAIN RETAIL	BEEF STEW	RAW	448	CFSAN117538	19	100	99.77	100	100	94.98	99.84	99.82	97.10	99.92	96.00	.	.	100.00	100.00	.	100.00	.	100	100	100	99.79	100.00	99.32
	CFSAN117539	Listeria innocua	MEDIUM RETAIL	WORS	MILLED BEEF	448	CFSAN117539	19	100	99.77	100	100	94.98	99.84	99.82	97.10	99.92	96.00	.	.	100.00	100.00	.	100.00	.	100	100	100	99.79	100.00	99.32
	CFSAN117540	Listeria innocua	MEDIUM RETAIL	BEEF STEAK	RAW	448	CFSAN117540	19	100	99.77	100	100	94.98	99.84	99.82	97.10	99.92	96.00	.	.	100.00	100.00	.	100.00	.	100	100	100	99.79	100.00	99.32
	CFSAN117547	Listeria innocua	LARGE RETAIL	KIDNEY	OFFAL & ORGANS	448	CFSAN117547	19	100	99.77	100	100	94.98	99.84	99.82	97.10	99.92	96.00	.	.	100.00	100.00	.	100.00	.	100	100	100	99.79	100.00	99.32
	CFSAN117549	Listeria innocua	CHAIN RETAIL	MINCED BEEF	MILLED BEEF	1085	CFSAN117549	15	100	99.77	100	100	99.54	99.84	99.82	97.10	99.92	.	.	.	.	.	.	.	.	100	100	100	99.79	100.00	99.32
	CFSAN117550	Listeria innocua	SMALL RETAIL	WORS	MILLED BEEF	602	CFSAN117550	15	100	99.77	100	100	94.98	99.84	99.82	97.10	99.92	.	.	.	.	.	.	.	.	100	100	100	99.79	100.00	99.32
	CFSAN117551	Listeria innocua	MEDIUM RETAIL	OFFAL	OFFAL & ORGANS	637	CFSAN117551	15	100	99.77	99.66	100	94.98	99.84	99.82	96.27	99.92	.	.	.	.	.	.	.	.	100	100	100	99.79	100.00	99.32
Farms	CFSAN117552	Listeria innocua	COMMUNAL FARM	FAECES	FAECES	637	CFSAN117552	15	100	99.77	99.66	100	94.98	99.84	99.82	96.27	99.92	.	.	.	.	.	.	.	.	100	100	100	99.79	100.00	99.32
(n=34)	CFSAN117553	Listeria innocua	COMMUNAL FARM	FAECES	FAECES	537	CFSAN117553	18	100	99.77	99.66	100	99.54	99.84	99.82	97.10	99.92	100.00	.	.	100.00	.	.	100.00	.	100	100	100	99.79	100.00	99.32
	CFSAN117554	Listeria innocua	COMMUNAL FARM	FAECES	FAECES	637	CFSAN117554	15	100	99.77	99.66	100	94.98	99.84	99.82	96.27	99.92	.	.	.	.	.	.	.	.	100	100	100	99.79	100.00	99.32
	CFSAN117556	Listeria innocua	COMMUNAL FARM	ENVIRONMENTAL-FAECES	ENVIRONMENT	1482	CFSAN117556	19	100	99.77	100	100	94.98	99.84	99.82	97.10	99.92	96.00	.	.	100.00	100.00	.	100.00	.	100	100	100	99.79	100.00	99.32
	CFSAN117557	Listeria innocua	COMMUNAL FARM	FAECES	FAECES	1087	CFSAN117557	18	100	99.77	99.66	100	94.98	99.84	99.82	96.69	99.92	96.00	.	.	100.00	100.00	.	.	.	100	100	100	99.79	100.00	99.32
	CFSAN117558	Listeria innocua	COMMUNAL FARM	FAECES	FAECES	637	CFSAN117558	15	100	99.77	99.66	100	94.98	99.84	99.82	96.27	99.92	.	.	.	.	.	.	.	.	100	100	100	99.79	100.00	99.32
	CFSAN117560	Listeria innocua	COMMUNAL FARM	FAECES	ENVIRONMENT	637	CFSAN117560	15	100	99.77	99.66	100	94.98	99.84	99.82	96.27	99.92	.	.	.	.	.	.	.	.	100	100	100	99.79	100.00	99.32
	CFSAN117563	Listeria innocua	COMMUNAL FARM	FAECES	ENVIRONMENT	637	CFSAN117563	15	100	99.77	99.66	100	94.98	99.84	99.82	96.27	99.92	.	.	.	.	.	.	.	.	100	100	100	99.79	100.00	99.32
	CFSAN117564	Listeria innocua	COW-CALF OPERATION	FAECES	FAECES	637	CFSAN117564	15	100	99.77	99.66	100	94.98	99.84	99.82	96.27	99.92	.	.	.	.	.	.	.	.	100	100	100	99.79	100.00	99.32
	CFSAN117566	Listeria innocua	COW-CALF OPERATION	FAECES	FAECES	637	CFSAN117566	15	100	99.77	99.66	100	94.98	99.84	99.82	96.27	99.92	.	.	.	.	.	.	.	.	100	100	100	99.79	100.00	99.32
	CFSAN117568	Listeria innocua	COW-CALF OPERATION	FAECES	FAECES	637	CFSAN117568	15	100	99.77	99.66	100	94.98	99.84	99.82	96.27	99.92	.	.	.	.	.	.	.	.	100	100	100	99.79	100.00	99.32
	CFSAN117569	Listeria innocua	COW-CALF OPERATION	FAECES	FAECES	637	CFSAN117569	14	100	99.77	99.66	100	.	99.84	99.82	96.27	99.92	.	.	.	.	.	.	.	.	100	100	100	99.79	100.00	99.32
	CFSAN117570	Listeria innocua	COW-CALF OPERATION	ENVIRONMENTAL-FAECES	ENVIRONMENT	537	CFSAN117570	19	100	99.77	99.66	100	99.54	99.84	99.82	97.10	99.92	100.00	.	.	100.00	100.00	.	100.00	.	100	100	100	99.79	100.00	99.32
	CFSAN117573	Listeria innocua	COW-CALF OPERATION	FAECES	FAECES	-	CFSAN117573	19	100	99.77	100	100	94.98	99.84	99.82	96.89	99.92	100.00	.	.	100.00	98.40	.	100.00	.	100	100	100	99.79	100.00	99.32
	CFSAN117574	Listeria innocua	COW-CALF OPERATION	FAECES	ENVIRONMENT	637	CFSAN117574	15	100	99.77	99.66	100	94.98	99.84	99.82	96.27	99.92	.	.	.	.	.	.	.	.	100	100	100	99.79	100.00	99.32
	CFSAN117575	Listeria innocua	COW-CALF OPERATION	FAECES	FAECES	637	CFSAN117575	15	100	99.77	99.66	100	94.98	99.84	99.82	96.27	99.92	.	.	.	.	.	.	.	.	100	100	100	99.79	100.00	99.32
	CFSAN117576	Listeria innocua	COW-CALF OPERATION	FAECES	FAECES	637	CFSAN117576	15	100	99.77	99.66	100	94.98	99.84	99.82	96.27	99.92	.	.	.	.	.	.	.	.	100	100	100	99.79	100.00	99.32
	CFSAN117578	Listeria innocua	COW-CALF OPERATION	FAECES	FAECES	637	CFSAN117578	15	100	99.77	99.66	100	94.98	99.84	99.82	96.27	99.92	.	.	.	.	.	.	.	.	100	100	100	99.79	100.00	99.32
	CFSAN117579	Listeria innocua	COW-CALF OPERATION	FAECES	FAECES	448	CFSAN117579	19	100	99.77	100	100	94.98	99.84	99.82	97.10	99.92	96.00	.	.	100.00	100.00	.	100.00	.	100	100	100	99.79	100.00	99.32
	CFSAN117580	Listeria innocua	COW-CALF OPERATION	ENVIRONMENTAL-WATER	ENVIRONMENT	1482	CFSAN117580	19	100	99.77	100	100	94.98	99.84	99.82	97.10	99.92	96.00	.	.	100.00	100.00	.	100.00	.	100	100	100	99.79	100.00	99.32
	CFSAN117581	Listeria innocua	COW-CALF OPERATION	FAECES	FAECES	448	CFSAN117581	19	100	99.77	100	100	94.98	99.84	99.82	97.10	99.92	96.00	.	.	100.00	100.00	.	100.00	.	100	100	100	99.79	100.00	99.32
	CFSAN117582	Listeria innocua	COW-CALF OPERATION	FEED	FEED	637	CFSAN117582	15	100	99.77	99.66	100	94.98	99.84	99.82	96.27	99.92	.	.	.	.	.	.	.	.	100	100	100	99.79	100.00	99.32
	CFSAN117583	Listeria innocua	FEEDLOT FARM	FAECES	FAECES	1482	CFSAN117583	19	100	99.77	100	100	94.98	99.84	99.82	97.10	99.92	96.00	.	.	100.00	100.00	.	100.00	.	100	100	100	99.79	100.00	99.32
	CFSAN117585	Listeria innocua	FEEDLOT FARM	FAECES	FAECES	43	CFSAN117585	19	100	99.77	100	100	99.54	99.84	99.82	97.10	99.92	96.00	.	.	100.00	98.40	.	100.00	.	100	100	100	99.79	100.00	99.32
	CFSAN117586	Listeria innocua	FEEDLOT FARM	FEED	FEED	637	CFSAN117586	15	100	99.77	99.66	100	94.98	99.84	99.82	96.27	99.92	.	.	.	.	.	.	.	.	100	100	100	99.79	100.00	99.32
	CFSAN117587	Listeria innocua	FEEDLOT FARM	FEED	FEED	637	CFSAN117587	15	100	99.77	99.66	100	94.98	99.84	99.82	96.27	99.92	.	.	.	.	.	.	.	.	100	100	100	99.79	100.00	99.32
	CFSAN117589	Listeria innocua	FEEDLOT FARM	FAECES	FAECES	1482	CFSAN117589	19	100	99.77	100	100	94.98	99.84	99.82	97.10	99.92	96.00	.	.	100.00	100.00	.	100.00	.	100	100	100	99.79	100.00	99.32
	CFSAN117590	Listeria innocua	FEEDLOT FARM	FAECES	FAECES	1482	CFSAN117590	19	100	99.77	100	100	94.98	99.84	99.82	97.10	99.92	96.00	.	.	100.00	100.00	.	100.00	.	100	100	100	99.79	100.00	99.32
	CFSAN117591	Listeria innocua	FEEDLOT FARM	FAECES	FAECES	1482	CFSAN117591	19	100	99.77	100	100	94.98	99.84	99.82	97.10	99.92	96.00	.	.	100.00	100.00	.	100.00	.	100	100	100	99.79	100.00	99.32
	CFSAN117592	Listeria innocua	FEEDLOT FARM	ENVIRONMENTAL-WATER	ENVIRONMENT	637	CFSAN117592	15	100	99.77	99.66	100	94.98	99.84	99.82	96.27	99.92	.	.	.	.	.	.	.	.	100	100	100	99.79	100.00	99.32
	CFSAN117593	Listeria innocua	FEEDLOT FARM	FAECES	FAECES	1610	CFSAN117593	18	100	99.77	100	100	.	99.84	99.82	97.10	99.92	96.00	.	.	100.00	100.00	.	100.00	.	100	100	100	99.79	100.00	99.32
	CFSAN117594	Listeria innocua	FEEDLOT FARM	FAECES	FAECES	1610	CFSAN117594	18	100	99.77	100	100	.	99.84	99.82	97.10	99.92	96.00	.	.	100.00	100.00	.	100.00	.	100	100	100	99.79	100.00	99.32
	CFSAN117595	Listeria innocua	FEEDLOT FARM	FAECES	FAECES	1610	CFSAN117595	18	100	99.77	100	100	.	99.84	99.82	97.10	99.92	96.00	.	.	100.00	92.00	.	100.00	.	100	100	100	99.79	100.00	99.32
	CFSAN117596	Listeria innocua	FEEDLOT FARM	ENVIRONMENTAL-WATER	ENVIRONMENT	1610	CFSAN117596	18	100	99.77	100	100	.	99.84	99.82	97.10	99.92	96.00	.	.	100.00	100.00	.	100.00	.	100	100	100	99.79	100.00	99.32
Abattoir	CFSAN119108	Listeria innocua	HIGH THROUGHPUT (HT)	ENVIRONMENTAL-EFFLUENT	ENVIRONMENT	637	CFSAN119108	15	100	99.77	99.66	100	94.98	99.84	99.82	96.27	99.92	.	.	.	.	.	.	.	.	100	100	100	99.79	100.00	99.32
(n=15)	CFSAN119109	Listeria innocua	HIGH THROUGHPUT (HT)	ENVIRONMENTAL-EFFLUENT	ENVIRONMENT	637	CFSAN119109	15	100	99.77	99.66	100	94.98	99.84	99.82	96.27	99.92	.	.	.	.	.	.	.	.	100	100	100	99.79	100.00	99.32
	CFSAN119115	Listeria innocua	LOW THROUGHPUT (LT)	FAECES	FAECES	537	CFSAN119115	19	100	99.77	99.66	100	99.54	99.84	99.82	97.10	99.92	100.00	.	.	100.00	100.00	.	100.00	.	100	100	100	99.79	100.00	99.32
	CFSAN119116	Listeria innocua	LOW THROUGHPUT (LT)	ENVIRONMENTAL-EFFLUENT	ENVIRONMENT	537	CFSAN119116	19	100	99.77	99.66	100	99.54	99.84	99.82	97.10	99.92	100.00	.	.	100.00	100.00	.	100.00	.	100	100	100	99.79	100.00	99.32
	CFSAN119121	Listeria innocua	HIGH THROUGHPUT (HT)	ENVIRONMENTAL-EFFLUENT	ENVIRONMENT	1085	CFSAN119121	15	100	99.77	100	100	99.54	99.84	99.82	97.10	99.92	.	.	.	.	.	.	.	.	100	100	100	99.79	100.00	99.32
	CFSAN119124	Listeria innocua	HIGH THROUGHPUT (HT)	ENVIRONMENTAL-EFFLUENT	ENVIRONMENT	1489	CFSAN119124	23	100	99.77	99.66	100	99.54	99.84	99.82	97.10	99.92	100.00	100.00	100.00	100.00	100.00	100.00	98.74	100.00	100	100	100	99.79	100.00	99.32
	CFSAN119125	Listeria innocua	LOW THROUGHPUT (LT)	PRE-EVISCERATION CARCASS SWAB	CARCASS	537	CFSAN119125	19	100	99.77	99.66	100	99.54	99.84	99.82	97.10	99.92	100.00	.	.	100.00	100.00	.	100.00	.	100	100	100	99.79	100.00	99.32
	CFSAN119126	Listeria innocua	HIGH THROUGHPUT (HT)	FAECES	FAECES	537	CFSAN119126	19	100	99.77	99.66	100	99.54	99.84	99.82	97.10	99.92	100.00	.	.	100.00	100.00	.	100.00	.	100	100	100	99.79	100.00	99.32
	CFSAN119127	Listeria innocua	HIGH THROUGHPUT (HT)	FAECES	FAECES	537	CFSAN119127	19	100	99.77	99.66	100	99.54	99.84	99.82	97.10	99.92	100.00	.	.	100.00	100.00	.	100.00	.	100	100	100	99.79	100.00	99.32
	CFSAN119128	Listeria innocua	HIGH THROUGHPUT (HT)	PRE-EVISCERATION CARCASS SWAB	CARCASS	537	CFSAN119128	19	100	99.77	99.66	100	99.54	99.84	99.82	97.10	99.92	100.00	.	.	100.00	82.53	.	100.00	.	100	100	100	99.79	100.00	99.32
	CFSAN119129	Listeria innocua	HIGH THROUGHPUT (HT)	ENVIRONMENTAL-EFFLUENT	ENVIRONMENT	537	CFSAN119129	19	100	99.77	99.66	100	99.54	99.84	99.82	97.10	99.92	100.00	.	.	100.00	100.00	.	100.00	.	100	100	100	99.79	100.00	99.32
	CFSAN119130	Listeria innocua	HIGH THROUGHPUT (HT)	FAECES	FAECES	537	CFSAN119130	19	100	99.77	99.66	100	99.54	99.84	99.82	97.10	99.92	100.00	.	.	100.00	100.00	.	100.00	.	100	100	100	99.79	100.00	99.32
	CFSAN119131	Listeria innocua	HIGH THROUGHPUT (HT)	FAECES	FAECES	537	CFSAN119131	19	100	99.77	99.66	100	99.54	99.84	99.82	97.10	99.92	100.00	.	.	100.00	100.00	.	100.00	.	100	100	100	99.79	100.00	99.32
	CFSAN119132	Listeria innocua	HIGH THROUGHPUT (HT)	PRE-EVISCERATION CARCASS SWAB	CARCASS	537	CFSAN119132	19	100	99.77	99.66	100	99.54	99.84	99.82	97.10	99.92	100.00	.	.	100.00	99.60	.	100.00	.	100	100	100	99.79	100.00	99.32
	CFSAN119133	Listeria innocua	HIGH THROUGHPUT (HT)	ENVIRONMENTAL-EFFLUENT	ENVIRONMENT	537	CFSAN119133	19	100	99.77	99.66	100	99.54	99.84	99.82	97.10	99.92	100.00	.	.	100.00	100.00	.	100.00	.	100	100	100	99.79	100.00	99.32
Total (n=110)
